# Supplementary material for: Management of uncomplicated malaria among children under five years at public and private sector facilities in Mali
Source: Springer Nature journal article supplement (doi:10.1186/s12889-020-09873-1), 2020-12-01
Supplement: MOESM1 [file 18670304]

**CONSULTATION RECORD AT HEALTH FACILITY/COMMUNITY HEALTH WORKER**

**A**

| IDENTIFICATION             |                                                                                                                                                                                                                                                                                                                                                                                                                                                                                                                                                                     |   |   |   |   |   |   |
|----------------------------|---------------------------------------------------------------------------------------------------------------------------------------------------------------------------------------------------------------------------------------------------------------------------------------------------------------------------------------------------------------------------------------------------------------------------------------------------------------------------------------------------------------------------------------------------------------------|---|---|---|---|---|---|
| FACILITY NAME _____        |                                                                                                                                                                                                                                                                                                                                                                                                                                                                                                                                                                     |   |   |   |   |   |   |
| DATE OF CONSULTATION ..... | <table style="display: inline-table; border-collapse: collapse;"> <tr> <td style="border: 1px solid black; width: 20px; text-align: center;">D</td> <td style="border: 1px solid black; width: 20px; text-align: center;">D</td> <td style="border: 1px solid black; width: 20px; text-align: center;">M</td> <td style="border: 1px solid black; width: 20px; text-align: center;">M</td> <td style="border: 1px solid black; width: 20px; text-align: center;">Y</td> <td style="border: 1px solid black; width: 20px; text-align: center;">Y</td> </tr> </table> | D | D | M | M | Y | Y |
| D                          | D                                                                                                                                                                                                                                                                                                                                                                                                                                                                                                                                                                   | M | M | Y | Y |   |   |
| FACILITY CODE .....        | <table style="display: inline-table; border-collapse: collapse;"> <tr> <td style="border: 1px solid black; width: 20px; text-align: center;"> </td> <td style="border: 1px solid black; width: 20px; text-align: center;"> </td> </tr> </table>                                                                                                                                                                                                                                                                                                                     |   |   |   |   |   |   |
|                            |                                                                                                                                                                                                                                                                                                                                                                                                                                                                                                                                                                     |   |   |   |   |   |   |
| CAREGIVER CODE .....       | <table style="display: inline-table; border-collapse: collapse;"> <tr> <td style="border: 1px solid black; width: 20px; text-align: center;"> </td> <td style="border: 1px solid black; width: 20px; text-align: center;"> </td> <td style="border: 1px solid black; width: 20px; text-align: center;"> </td> <td style="border: 1px solid black; width: 20px; text-align: center;"> </td> </tr> </table>                                                                                                                                                           |   |   |   |   |   |   |
|                            |                                                                                                                                                                                                                                                                                                                                                                                                                                                                                                                                                                     |   |   |   |   |   |   |
| UNIQUE CAREGIVER ID .....  | <table style="display: inline-table; border-collapse: collapse;"> <tr> <td style="border: 1px solid black; width: 20px; text-align: center;"> </td> <td style="border: 1px solid black; width: 20px; text-align: center;"> </td> <td style="border: 1px solid black; width: 20px; text-align: center;"> </td> <td style="border: 1px solid black; width: 20px; text-align: center;"> </td> <td style="border: 1px solid black; width: 20px; text-align: center;"> </td> <td style="border: 1px solid black; width: 20px; text-align: center;"> </td> </tr> </table> |   |   |   |   |   |   |
|                            |                                                                                                                                                                                                                                                                                                                                                                                                                                                                                                                                                                     |   |   |   |   |   |   |

**SECTION 1. CONSULTATION RECORD**

| NO. | QUESTIONS AND FILTERS                                                                                        | CODING CATEGORIES                                                                                                                                                                                                                                                                                                                                                                                                                                                                                                                                                | SKIP |  |  |  |  |
|-----|--------------------------------------------------------------------------------------------------------------|------------------------------------------------------------------------------------------------------------------------------------------------------------------------------------------------------------------------------------------------------------------------------------------------------------------------------------------------------------------------------------------------------------------------------------------------------------------------------------------------------------------------------------------------------------------|------|--|--|--|--|
| 101 | Name child                                                                                                   | _____                                                                                                                                                                                                                                                                                                                                                                                                                                                                                                                                                            |      |  |  |  |  |
| 102 | Is [child] male or female?                                                                                   | MALE ..... 1<br>FEMALE ..... 2                                                                                                                                                                                                                                                                                                                                                                                                                                                                                                                                   |      |  |  |  |  |
| 103 | How old is [child]?<br><small>(IF LESS THAN ONE YEAR OLD, ENTER 00 YEARS AND COMPLETE AGE IN MONTHS)</small> | AGE IN COMPLETED YEARS ..... <table style="display: inline-table; border-collapse: collapse;"><tr><td style="border: 1px solid black; width: 20px; text-align: center;"> </td><td style="border: 1px solid black; width: 20px; text-align: center;"> </td></tr></table><br>If <1 year:<br>AGE IN COMPLETED MONTHS ... <table style="display: inline-table; border-collapse: collapse;"><tr><td style="border: 1px solid black; width: 20px; text-align: center;"> </td><td style="border: 1px solid black; width: 20px; text-align: center;"> </td></tr></table> |      |  |  |  |  |
|     |                                                                                                              |                                                                                                                                                                                                                                                                                                                                                                                                                                                                                                                                                                  |      |  |  |  |  |
|     |                                                                                                              |                                                                                                                                                                                                                                                                                                                                                                                                                                                                                                                                                                  |      |  |  |  |  |
| 104 | What is the axillary temperature (in °C)?                                                                    | <table style="display: inline-table; border-collapse: collapse;"> <tr> <td style="border: 1px solid black; width: 20px; text-align: center;"> </td> <td style="border: 1px solid black; width: 20px; text-align: center;"> </td> <td style="border: 1px solid black; width: 20px; text-align: center;"> </td> </tr> </table><br>If not measured, enter 99.9                                                                                                                                                                                                      |      |  |  |  |  |
|     |                                                                                                              |                                                                                                                                                                                                                                                                                                                                                                                                                                                                                                                                                                  |      |  |  |  |  |
| 105 | What diagnostic method was used?                                                                             | NONE ..... 0<br>CLINICAL ONLY ..... 1<br>RAPID DIAGNOSTIC TEST ..... 2<br>MICROSCOPY ..... 3<br>OTHER _____ 8<br><span style="margin-left: 100px;"><small>(specify)</small></span>                                                                                                                                                                                                                                                                                                                                                                               |      |  |  |  |  |
| 106 | What is the diagnosis made by the health provider?                                                           | MALARIA ..... 1<br>NOT MALARIA ..... 0                                                                                                                                                                                                                                                                                                                                                                                                                                                                                                                           |      |  |  |  |  |
| 107 | What was the result of the malaria diagnostic                                                                | NEGATIVE ..... 0<br>POSITIVE ..... 1<br>NOT TESTED ..... 7<br>INVALID ..... 8<br>DON'T KNOW ..... 9                                                                                                                                                                                                                                                                                                                                                                                                                                                              |      |  |  |  |  |

| NO. | QUESTIONS AND FILTERS                                                                                  | CODING CATEGORIES                                                                                                                                                                                                                                                                                                                                                                                                                                                                                                                                                                                                                                                                                                                                                                                | SKIP |
|-----|--------------------------------------------------------------------------------------------------------|--------------------------------------------------------------------------------------------------------------------------------------------------------------------------------------------------------------------------------------------------------------------------------------------------------------------------------------------------------------------------------------------------------------------------------------------------------------------------------------------------------------------------------------------------------------------------------------------------------------------------------------------------------------------------------------------------------------------------------------------------------------------------------------------------|------|
| 108 | <p>What drugs were prescribed or given to the sick child?</p> <p>(LIST ALL DRUGS PRESCRIBED/GIVEN)</p> | <p><b>ANTIMALARIALS</b></p> <p>ARTEMETHER-LUMEFANTRINE (COARTEM) A</p> <p>ARTESUNATE-AMODIAQUINE ..... B</p> <p>SP ..... C</p> <p>SP-AMODIAQUINE ..... D</p> <p>CHLOROQUINE ..... E</p> <p>AMODIAQUINE ..... F</p> <p>QUININE PILLS ..... G</p> <p>QUININE INJECTION IV/IM ..... H</p> <p>ARTESUNATE RECTAL ..... I</p> <p>ARTESUNATE INJECTION IV/IM ..... J</p> <p>OTHER ANTIMALARIAL ..... K</p> <p>_____ (specify)</p> <p><b>ANTIBIOTICS</b></p> <p>AMOXICILLIN ..... L</p> <p>ANTIBIOTIC PILLS / SYRUP ..... M</p> <p>ANTIBIOTIC INJECTION ..... N</p> <p>ASPIRIN ..... O</p> <p>PARACETAMOL / ACETAMINOPHEN ..... P</p> <p>IBUPROFEN ..... Q</p> <p>KUNBILENI ..... R</p> <p>KUNBILENI JEMAN ..... S</p> <p>OTHER NOT LISTED: _____ X</p> <p>_____ (specify)</p> <p>DON'T KNOW ..... Z</p> |      |
| 109 | <p>Where do you intend to collect these drugs?</p>                                                     | <p>DRUGS COLLECTED AT FACILITY ..... 1</p> <p>DRUGS COLLECTED FROM ELSEWHERE .. 2</p> <p>DEPENDS ON PATIENT PREFERENCE ..... 3</p> <p>DON'T KNOW ..... 9</p>                                                                                                                                                                                                                                                                                                                                                                                                                                                                                                                                                                                                                                     |      |
