# Supplementary material for: Management of uncomplicated malaria among children under five years at public and private sector facilities in Mali
Source: Springer Nature journal article supplement (doi:10.1186/s12889-020-09873-1), 2020-12-01
Supplement: MOESM3 [file 18670304]

Supplementary File 3

Fomba et al. Management of uncomplicated malaria among children under five years at public and private sector facilities in Mali

**Description of case management practices at all sites and correct/incorrect case management designation**

|                             | Parasitological testing  |             |                            | Treatment provided                                                  |             |             |
|-----------------------------|--------------------------|-------------|----------------------------|---------------------------------------------------------------------|-------------|-------------|
|                             | Scenario                 | n           | %                          | Scenario                                                            | n           | %           |
| <b>ALL RECRUITING SITES</b> | Tested by RDT            | 507         | 31.7                       | Negative test result, given no antimalarial drug of any type        | 120         | 7.5         |
|                             | Tested by microscopy     | 287         | 17.9                       | Positive test result, given ACT and no other antimalarial           | 259         | 16.2        |
|                             | <b>Correctly managed</b> | <b>794</b>  | <b>49.6</b>                | <b>Correctly managed</b>                                            | <b>379</b>  | <b>23.7</b> |
|                             | Not tested               | 807         | 50.4                       | Positive test result, given ACT and non-ACT antimalarial            | 106         | 6.6         |
|                             |                          |             |                            | Positive test result, given non-ACT antimalarial but not ACT        | 185         | 11.5        |
|                             |                          |             |                            | Positive test result, not given any type of antimalarial            | 23          | 1.4         |
|                             |                          |             |                            | Negative test result, given ACT and no other antimalarial           | 66          | 4.1         |
|                             |                          |             |                            | Negative test result, given ACT and non-ACT antimalarial            | 14          | 0.9         |
|                             |                          |             |                            | Negative test result, given non-ACT antimalarial but not ACT        | 15          | 0.9         |
|                             |                          |             |                            | Not tested, given ACT and no other antimalarial                     | 197         | 12.3        |
|                             |                          |             |                            | Not tested, given ACT and non-ACT antimalarial                      | 142         | 8.9         |
|                             |                          |             |                            | Not tested, given non-ACT antimalarial but not ACT                  | 271         | 16.9        |
|                             |                          |             |                            | Not tested, no antimalarial                                         | 197         | 12.3        |
|                             |                          |             |                            | Tested, did not know result and given ACT and no other antimalarial | 3           | 0.2         |
|                             |                          |             |                            | Tested, result unknown, given ACT and non-ACT                       | 0           | 0.0         |
|                             |                          |             |                            | Tested, result unknown, given non-ACT but not ACT                   | 2           | 0.1         |
|                             |                          |             |                            | Tested, did not know result, no antimalarial                        | 2           | 0.1         |
| <b>Incorrectly managed</b>  | <b>807</b>               | <b>50.4</b> | <b>Incorrectly managed</b> | <b>1223</b>                                                         | <b>76.3</b> |             |
