# Supplementary material for: Management of uncomplicated malaria among children under five years at public and private sector facilities in Mali
Source: Springer Nature journal article supplement (doi:10.1186/s12889-020-09873-1), 2020-12-01
Supplement: MOESM6 [file 18670304]

## Supplementary File 6

Fomba et al. Management of uncomplicated malaria among children under five years at public and private sector facilities in Mali

**Description of case management practices by study site type and correct/incorrect case management designation**

|                                | Parasitological testing    |            |             | Treatment provided                                                  |            |             |
|--------------------------------|----------------------------|------------|-------------|---------------------------------------------------------------------|------------|-------------|
|                                | Scenario                   | n          | %           | Scenario                                                            | n          | %           |
| <b>PUBLIC URBAN FACILITIES</b> | Tested by RDT              | 101        | 24.0        | Negative test result, given no antimalarial drug of any type        | 26         | 6.2         |
|                                | Tested by microscopy       | 251        | 59.6        | Positive test result, given ACT and no other antimalarial           | 108        | 25.7        |
|                                | <b>Correctly managed</b>   | <b>352</b> | <b>83.6</b> | <b>Correctly managed</b>                                            | <b>134</b> | <b>31.8</b> |
|                                | Not tested                 | 69         | 16.4        | Positive test result, given ACT and non-ACT antimalarial            | 30         | 7.1         |
|                                |                            |            |             | Positive test result, given non-ACT antimalarial but not ACT        | 123        | 29.2        |
|                                |                            |            |             | Positive test result, not given any type of antimalarial            | 3          | 0.7         |
|                                |                            |            |             | Negative test result, given ACT and no other antimalarial           | 47         | 11.2        |
|                                |                            |            |             | Negative test result, given ACT and non-ACT antimalarial            | 7          | 1.7         |
|                                |                            |            |             | Negative test result, given non-ACT antimalarial but not ACT        | 8          | 1.9         |
|                                |                            |            |             | Not tested, given ACT and no other antimalarial                     | 35         | 8.3         |
|                                |                            |            |             | Not tested, given ACT and non-ACT antimalarial                      | 4          | 1.0         |
|                                |                            |            |             | Not tested, given non-ACT antimalarial but not ACT                  | 12         | 2.9         |
|                                |                            |            |             | Not tested, no antimalarial                                         | 18         | 4.3         |
|                                |                            |            |             | Tested, did not know result and given ACT and no other antimalarial | 0          | 0.0         |
|                                |                            |            |             | Tested, result unknown, given ACT and non-ACT                       | 0          | 0.0         |
|                                |                            |            |             | Tested, result unknown, given non-ACT but not ACT                   | 0          | 0.0         |
|                                |                            |            |             | Tested, did not know result, no antimalarial                        | 0          | 0.0         |
|                                | <b>Incorrectly managed</b> | <b>69</b>  | <b>16.4</b> | <b>Incorrectly managed</b>                                          | <b>287</b> | <b>68.2</b> |

PUBLIC RURAL FACILITIES

| Parasitological testing    |            |             | Treatment provided                                                  |            |             |
|----------------------------|------------|-------------|---------------------------------------------------------------------|------------|-------------|
| Scenario                   | n          | %           | Scenario                                                            | n          | %           |
| Tested by RDT              | 112        | 26.7        | Negative test result, given no antimalarial drug of any type        | 7          | 1.7         |
| Tested by microscopy       | 1          | 0.2         | Positive test result, given ACT and no other antimalarial           | 15         | 3.6         |
| <b>Correctly managed</b>   | <b>113</b> | <b>26.9</b> | <b>Correctly managed</b>                                            | <b>22</b>  | <b>5.2</b>  |
| Not tested                 | 307        | 73.1        | Positive test result, given ACT and non-ACT antimalarial            | 57         | 13.6        |
|                            |            |             | Positive test result, given non-ACT antimalarial but not ACT        | 26         | 6.2         |
|                            |            |             | Positive test result, not given any type of antimalarial            | 1          | 0.2         |
|                            |            |             | Negative test result, given ACT and no other antimalarial           | 1          | 0.2         |
|                            |            |             | Negative test result, given ACT and non-ACT antimalarial            | 4          | 1.0         |
|                            |            |             | Negative test result, given non-ACT antimalarial but not ACT        | 2          | 0.5         |
|                            |            |             | Not tested, given ACT and no other antimalarial                     | 13         | 3.1         |
|                            |            |             | Not tested, given ACT and non-ACT antimalarial                      | 115        | 27.4        |
|                            |            |             | Not tested, given non-ACT antimalarial but not ACT                  | 170        | 40.5        |
|                            |            |             | Not tested, no antimalarial                                         | 9          | 2.1         |
|                            |            |             | Tested, did not know result and given ACT and no other antimalarial | 0          | 0.0         |
|                            |            |             | Tested, result unknown, given ACT and non-ACT                       | 0          | 0.0         |
|                            |            |             | Tested, result unknown, given non-ACT but not ACT                   | 0          | 0.0         |
|                            |            |             | Tested, did not know result, no antimalarial                        | 0          | 0.0         |
| <b>Incorrectly managed</b> | <b>307</b> | <b>73.1</b> | <b>Incorrectly managed</b>                                          | <b>398</b> | <b>94.8</b> |

COMMUNITY HEALTH WORKERS

| Parasitological testing    |            |             | Treatment provided                                                  |            |             |
|----------------------------|------------|-------------|---------------------------------------------------------------------|------------|-------------|
| Scenario                   | n          | %           | Scenario                                                            | n          | %           |
| Tested by RDT              | 283        | 66.6        | Negative test result, given no antimalarial drug of any type        | 79         | 19.0        |
| Tested by microscopy       | 0          | 0.0         | Positive test result, given ACT and no other antimalarial           | 112        | 27.0        |
| <b>Correctly managed</b>   | <b>283</b> | <b>66.6</b> | <b>Correctly managed</b>                                            | <b>191</b> | <b>46.0</b> |
| Not tested                 | 142        | 33.4        | Positive test result, given ACT and non-ACT antimalarial            | 5          | 1.2         |
|                            |            |             | Positive test result, given non-ACT antimalarial but not ACT        | 33         | 8.0         |
|                            |            |             | Positive test result, not given any type of antimalarial            | 19         | 4.6         |
|                            |            |             | Negative test result, given ACT and no other antimalarial           | 16         | 3.9         |
|                            |            |             | Negative test result, given ACT and non-ACT antimalarial            | 1          | 0.2         |
|                            |            |             | Negative test result, given non-ACT antimalarial but not ACT        | 5          | 1.2         |
|                            |            |             | Not tested, given ACT and no other antimalarial                     | 45         | 10.8        |
|                            |            |             | Not tested, given ACT and non-ACT antimalarial                      | 21         | 5.1         |
|                            |            |             | Not tested, given non-ACT antimalarial but not ACT                  | 46         | 11.1        |
|                            |            |             | Not tested, no antimalarial                                         | 30         | 7.2         |
|                            |            |             | Tested, did not know result and given ACT and no other antimalarial | 2          | 0.5         |
|                            |            |             | Tested, result unknown, given ACT and non-ACT                       | 0          | 0.0         |
|                            |            |             | Tested, result unknown, given non-ACT but not ACT                   | 0          | 0.0         |
|                            |            |             | Tested, did not know result, no antimalarial                        | 1          | 0.2         |
| <b>Incorrectly managed</b> | <b>142</b> | <b>33.4</b> | <b>Incorrectly managed</b>                                          | <b>224</b> | <b>54.0</b> |

PRIVATE URBAN FACILITIES

| Parasitological testing    |            |             | Treatment provided                                                  |            |             |
|----------------------------|------------|-------------|---------------------------------------------------------------------|------------|-------------|
| Scenario                   | n          | %           | Scenario                                                            | n          | %           |
| Tested by RDT              | 11         | 3.3         | Negative test result, given no antimalarial drug of any type        | 8          | 2.4         |
| Tested by microscopy       | 35         | 10.4        | Positive test result, given ACT and no other antimalarial           | 14         | 4.2         |
| <b>Correctly managed</b>   | <b>46</b>  | <b>13.7</b> | <b>Correctly managed</b>                                            | <b>22</b>  | <b>6.5</b>  |
| Not tested                 | 290        | 86.3        | Positive test result, given ACT and non-ACT antimalarial            | 14         | 4.2         |
|                            |            |             | Positive test result, given non-ACT antimalarial but not ACT        | 3          | 0.9         |
|                            |            |             | Positive test result, not given any type of antimalarial            | 0          | 0.0         |
|                            |            |             | Negative test result, given ACT and no other antimalarial           | 2          | 0.6         |
|                            |            |             | Negative test result, given ACT and non-ACT antimalarial            | 2          | 0.6         |
|                            |            |             | Negative test result, given non-ACT antimalarial but not ACT        | 0          | 0.0         |
|                            |            |             | Not tested, given ACT and no other antimalarial                     | 105        | 31.3        |
|                            |            |             | Not tested, given ACT and non-ACT antimalarial                      | 2          | 0.6         |
|                            |            |             | Not tested, given non-ACT antimalarial but not ACT                  | 43         | 12.8        |
|                            |            |             | Not tested, no antimalarial                                         | 140        | 41.7        |
|                            |            |             | Tested, did not know result and given ACT and no other antimalarial | 1          | 0.3         |
|                            |            |             | Tested, result unknown, given ACT and non-ACT                       | 0          | 0.0         |
|                            |            |             | Tested, result unknown, given non-ACT but not ACT                   | 1          | 0.3         |
|                            |            |             | Tested, did not know result, no antimalarial                        | 1          | 0.3         |
| <b>Incorrectly managed</b> | <b>290</b> | <b>86.3</b> | <b>Incorrectly managed</b>                                          | <b>314</b> | <b>93.5</b> |
